# Supplementary material
Source: HighWire-hosted journal article supplement (http://www.cmaj.ca/highwire/filestream/146473/field_highwire_adjunct_files/1/220272-res-2-at.pdf)
Supplement: 220272-res-2-at.pdf [file 220272-res-2-at.pdf]

**eTable 1. Frequency of diagnoses for 30-day readmissions by CIHI Case Mix Group (CMG) Major Clinical/Diagnostic Category**

| Rank | Alberta                                          |                                                                                |      | Ontario                                          |                                                                                |      |
|------|--------------------------------------------------|--------------------------------------------------------------------------------|------|--------------------------------------------------|--------------------------------------------------------------------------------|------|
|      | CIHI CMG Major Clinical Category and description | Percent                                                                        |      | CIHI CMG Major Clinical Category and description | Percent                                                                        |      |
| 1    | 4                                                | Diseases and Disorders of the Respiratory System                               | 43.6 | 4                                                | Diseases and Disorders of the Respiratory System                               | 48.5 |
| 2    | 5                                                | Diseases and Disorders of the Circulatory System                               | 9.9  | 5                                                | Diseases and Disorders of the Circulatory System                               | 11.6 |
| 3    | 17                                               | Mental Diseases & Disorders                                                    | 6.4  | 6                                                | Diseases and Disorders of the Digestive System                                 | 6.5  |
| 4    | 20                                               | Other Reasons for Hospitalization                                              | 5.8  | 20                                               | Other Reasons for Hospitalization                                              | 5.0  |
| 5    | 6                                                | Diseases and Disorders of the Digestive System                                 | 5.0  | 11                                               | Diseases and Disorders of the Kidney, Urinary Tract & Male Reproductive System | 4.6  |
| 6    | 19                                               | Trauma, Injury, Poisoning & Toxic Effect of Drugs                              | 4.6  | 17                                               | Mental Diseases & Disorders                                                    | 3.4  |
| 7    | 11                                               | Diseases and Disorders of the Kidney, Urinary Tract & Male Reproductive System | 4.3  | 16                                               | Multisystemic or Unspecified Site Infections                                   | 3.4  |
| 8    | 1                                                | Diseases and Disorders of the Nervous System                                   | 3.7  | 1                                                | Diseases and Disorders of the Nervous System                                   | 3.1  |
| 9    | 10                                               | Diseases and Disorders of the Endocrine System, Nutrition & Metabolism         | 3.6  | 19                                               | Trauma, Injury, Poisoning & Toxic Effect of Drugs                              | 2.9  |
| 10   | 7                                                | Diseases and Disorders of the Hepatobiliary System & Pancreas                  | 2.4  | 10                                               | Diseases and Disorders of the Endocrine System, Nutrition & Metabolism         | 2.6  |
| 11   | 15                                               | Diseases and Disorders of the Blood & Lymphatic System                         | 2.4  | 7                                                | Diseases and Disorders of the Hepatobiliary System & Pancreas                  | 2.4  |
| 12   | 8                                                | Diseases and Disorders of the Musculoskeletal System & Connective Tissue       | 2.2  | 8                                                | Diseases and Disorders of the Musculoskeletal System & Connective Tissue       | 2.0  |
| 13   | 9                                                | Diseases and Disorders of the Skin, Subcutaneous Tissue & Breast               | 2.1  | 15                                               | Diseases and Disorders of the Blood & Lymphatic System                         | 1.7  |
| 14   | 16                                               | Multisystemic or Unspecified Site Infections                                   | 2    | 9                                                | Diseases and Disorders of the Skin, Subcutaneous Tissue & Breast               | 1.3  |

**eTable 2. Baseline characteristics of Alberta and Ontario adults hospitalized with a SARS-CoV2 positive test and discharged alive after a hospital stay of 30 days or less between Jan 2020 and Sep 2021, stratified by readmission or death within 7 and 90 days after discharge**

| Characteristic                                     | Alberta                                  |                                    |                 |                                     |                 | Ontario                                  |                                    |                 |                                     |                 |
|----------------------------------------------------|------------------------------------------|------------------------------------|-----------------|-------------------------------------|-----------------|------------------------------------------|------------------------------------|-----------------|-------------------------------------|-----------------|
|                                                    | Overall                                  | Readmission or death within 7 days |                 | Readmission or death within 90 days |                 | Overall                                  | Readmission or death within 7 days |                 | Readmission or death within 90 days |                 |
|                                                    |                                          | Yes                                | No              | Yes                                 | No              |                                          | Yes                                | No              | Yes                                 | No              |
| Patients, n                                        | <b>N = 7875</b>                          | <b>N = 397</b>                     | <b>N = 7478</b> | <b>N = 1169</b>                     | <b>N = 6706</b> | <b>N=22,461</b>                          | <b>N=1307</b>                      | <b>N=21,154</b> | <b>N=3356</b>                       | <b>N=19,105</b> |
|                                                    | <i>n (%), unless otherwise specified</i> |                                    |                 |                                     |                 | <i>n (%), unless otherwise specified</i> |                                    |                 |                                     |                 |
| Mean age at time of admission, years (SD)          | 57.4 (17.3)                              | 64.8 (18.1)                        | 57.1 (17.1)     | 63.6 (18.4)                         | 56.4 (16.9)     | 61.4 (17.2)                              | 69.7 (17.1)                        | 60.9 (17.0)     | 70.2 (17.1)                         | 59.9 (16.7)     |
| Male                                               | 4429 (56.2)                              | 249 (62.7)                         | 4180 (55.9)     | 677 (57.9)                          | 3752 (55.9)     | 12,333 (54.9)                            | 746 (57.1)                         | 11,587 (54.8)   | 1815 (54.1)                         | 10,518 (55.1)   |
| Rural resident                                     | 1474 (18.7)                              | 83 (20.9)                          | 1391 (18.6)     | 236 (20.2)                          | 1238 (18.5)     | 879 (3.9)                                | 56 (4.3)                           | 823 (3.9)       | 144 (4.3)                           | 735 (3.8)       |
| Deprivation index quintile*                        |                                          |                                    |                 |                                     |                 |                                          |                                    |                 |                                     |                 |
| 1 (least deprived)                                 | 951 (12.1)                               | 37 (9.3)                           | 914 (12.2)      | 123 (10.5)                          | 828 (12.3)      | 3357 (14.9)                              | 174 (13.3)                         | 3183 (15.0)     | 484 (14.4)                          | 2873 (15.0)     |
| 2                                                  | 1138 (14.5)                              | 57 (14.4)                          | 1081 (14.5)     | 146 (12.5)                          | 992 (14.8)      | 3811 (17.0)                              | 231 (17.7)                         | 3580 (16.9)     | 563 (16.8)                          | 3248 (17.0)     |
| 3                                                  | 1230 (15.6)                              | 48 (12.1)                          | 1182 (15.8)     | 156 (13.3)                          | 1074 (16.0)     | 4140 (18.4)                              | 261 (20.0)                         | 3879 (18.3)     | 615 (18.3)                          | 3525 (18.5)     |
| 4                                                  | 1484 (18.8)                              | 86 (21.7)                          | 1398 (18.7)     | 211 (18.0)                          | 1273 (19.0)     | 4652 (20.7)                              | 255 (19.5)                         | 4397 (20.8)     | 678 (20.2)                          | 3974 (20.8)     |
| 5 (most deprived)                                  | 2187 (27.8)                              | 112 (28.2)                         | 2075 (27.7)     | 339 (29.0)                          | 1848 (27.6)     | 6275 (27.9)                              | 373 (28.5)                         | 5902 (27.9)     | 978 (29.1)                          | 5297 (27.7)     |
| Unknown                                            | 885 (11.2)                               | 57 (14.4)                          | 828 (11.1)      | 194 (16.6)                          | 691 (10.3)      | 226 (1.0)                                | 13 (1.0)                           | 213 (1.0)       | 38 (1.1)                            | 188 (1.0)       |
| Long-term care resident                            | 98 (1.2)                                 | 8 (2.0)                            | 90 (1.2)        | 41 (3.5)                            | 57 (0.8)        | 516 (2.3)                                | 81 (6.2)                           | 435 (2.1)       | 208 (6.2)                           | 308 (1.6)       |
| Non-elective hospitalization in previous 12 months | 1666 (21.2)                              | 127 (32.0)                         | 1539 (20.6)     | 487 (41.7)                          | 1179 (17.6)     | 3183 (14.2)                              | 358 (27.4)                         | 2825 (13.4)     | 1162 (34.6)                         | 2021 (10.6)     |
| Non-elective hospitalization in previous 3 months  | 1016 (12.9)                              | 67 (16.9)                          | 949 (12.7)      | 281 (24.0)                          | 735 (11.0)      | 1576 (7.0)                               | 210 (16.1)                         | 1366 (6.5)      | 681 (20.3)                          | 895 (4.7)       |
| ED visit in previous 6 months                      | 4782 (60.7)                              | 264 (66.5)                         | 4518 (60.4)     | 838 (71.7)                          | 3944 (58.8)     | 13,096 (58.3)                            | 835 (63.9)                         | 12,261 (58.0)   | 2241 (66.8)                         | 10,855 (56.8)   |

|                                                              |              |              |              |              |              |               |              |               |              |               |
|--------------------------------------------------------------|--------------|--------------|--------------|--------------|--------------|---------------|--------------|---------------|--------------|---------------|
| Number of ED visits in previous 6 months, median (Q1-Q3)     | 1 (1-2)      | 2 (1-3)      | 1 (1-2)      | 2 (1-4)      | 1 (1-2)      | 0 (0-1)       | 0 (0-2)      | 0 (0-1)       | 1 (0-2)      | 0 (0-1)       |
| <b>Index hospitalization episode characteristics</b>         |              |              |              |              |              |               |              |               |              |               |
| Elective                                                     | 148 (1.9)    | 12 (3.0)     | 136 (1.8)    | 36 (3.1)     | 112 (1.7)    | 313 (1.4)     | 24 (1.8)     | 289 (1.4)     | 62 (1.8)     | 251 (1.3)     |
| Urgent/emergent                                              | 7727 (98.1)  | 385 (97.0)   | 7342 (98.2)  | 1133 (96.9)  | 6594 (98.3)  | 22,148 (98.6) | 1283 (98.2)  | 20,865 (98.6) | 3294 (98.2)  | 18,854 (98.7) |
| SARS-CoV-2 positive prior to or within 48 hours of admission | 7179 (91.2)  | 357 (89.9)   | 6822 (91.2)  | 1029 (88.0)  | 6150 (91.7)  | 21,184 (94.3) | 1155 (88.4)  | 20,029 (94.7) | 2908 (86.7)  | 18,276 (95.7) |
| SARS-CoV-2 positive after 48 hours of admission              | 696 (8.8)    | 40 (10.1)    | 656 (8.8)    | 140 (12.0)   | 556 (8.3)    | 1277 (5.7)    | 152 (11.6)   | 1125 (5.3)    | 448 (13.3)   | 829 (4.3)     |
| Discharged on weekend/holiday                                | 2128 (27.0)  | 111 (28.0)   | 2017 (27.0)  | 306 (26.2)   | 1822 (27.2)  | 4531 (20.2)   | 286 (21.9)   | 4245 (20.1)   | 595 (17.7)   | 3936 (20.6)   |
| Medical                                                      | 7615 (96.7)  | 388 (97.7)   | 7227 (96.6)  | 1118 (95.6)  | 6497 (96.9)  | 21,774 (96.9) | 1253 (95.9)  | 20,521 (97.0) | 3200 (95.4)  | 18,574 (97.2) |
| Surgical                                                     | 260 (3.3)    | 9 (2.3)      | 251 (3.4)    | 51 (4.4)     | 209 (3.1)    | 687 (3.1)     | 54 (4.1)     | 633 (3.0)     | 156 (4.6)    | 531 (2.8)     |
| ICU admission                                                | 1055 (13.4)  | 25 (6.3)     | 1030 (13.8)  | 81 (6.9)     | 974 (14.5)   | 3487 (15.5)   | 110 (8.4)    | 3377 (16.0)   | 360 (10.7)   | 3127 (16.4)   |
| ICU hours among those with an ICU stay, median (Q1-Q3)       | 134 (75-219) | 112 (48-168) | 135 (76-219) | 101 (47-182) | 140 (77-221) | 120 (65-209)  | 115 (47-219) | 120 (65-208)  | 103 (47-202) | 122 (67-210)  |
| Teaching hospital                                            | 1316 (16.7)  | 63 (15.9)    | 1253 (16.8)  | 208 (17.8)   | 1108 (16.5)  | 4671 (20.8)   | 304 (23.3)   | 4367 (20.6)   | 765 (22.8)   | 3906 (20.4)   |
| Mean length of stay (SD)                                     | 8.09 (6.15)  | 7.41 (6.70)  | 8.12 (6.11)  | 8.84 (6.94)  | 7.96 (5.99)  | 8.6 (6.7)     | 8.3 (7.6)    | 8.6 (6.6)     | 9.9 (7.7)    | 8.4 (6.5)     |
| Discharge disposition                                        |              |              |              |              |              |               |              |               |              |               |
| Home without home care                                       | 6683 (84.9)  | 278 (70.0)   | 6405 (85.7)  | 787 (67.3)   | 5896 (87.9)  | 14,107 (62.8) | 580 (44.4)   | 13,527 (63.9) | 1348 (40.2)  | 12,759 (66.8) |
| Home with home care                                          | 671 (8.5)    | 72 (18.1)    | 599 (8.0)    | 230 (19.7)   | 441 (6.6)    | 6470 (28.8)   | 558 (42.7)   | 5912 (27.9)   | 1490 (44.4)  | 4980 (26.1)   |
| Long-term care/skilled nursing facility                      | 521 (6.6)    | 47 (11.8)    | 474 (6.3)    | 152 (13.0)   | 369 (5.5)    | 1884 (8.4)    | 169 (12.9)   | 1715 (8.1)    | 518 (15.4)   | 1366 (7.1)    |
| SARS-Cov-2 strain                                            |              |              |              |              |              |               |              |               |              |               |
| Ancestral, original strain                                   | 3018 (38.3)  | 172 (43.3)   | 2846 (38.1)  | 500 (42.8)   | 2518 (37.5)  | 8647 (38.5)   | 557 (42.6)   | 8090 (38.2)   | 1442 (43.0)  | 7205 (37.7)   |

|                                                                                            |                |               |                |                |                |                  |                |                  |                |                 |
|--------------------------------------------------------------------------------------------|----------------|---------------|----------------|----------------|----------------|------------------|----------------|------------------|----------------|-----------------|
| Alpha VOC                                                                                  | 1551<br>(19.7) | 49<br>(12.3)  | 1502<br>(20.1) | 153 (13.1)     | 1398<br>(20.8) | 7059<br>(31.4)   | 331<br>(25.3)  | 6728<br>(31.8)   | 808 (24.1)     | 6251<br>(32.7)  |
| Delta VOC                                                                                  | 1429<br>(18.1) | 80<br>(20.2)  | 1349<br>(18.0) | 193 (16.5)     | 1236<br>(18.4) | 867 (3.9)        | 46 (3.5)       | 821 (3.9)        | 94 (2.8)       | 773 (4.0)       |
| Other VOC                                                                                  | 227 (2.9)      | 6 (1.5)       | 221 (3.0)      | 14 (1.2)       | 213 (3.2)      | 1464 (6.5)       | 78 (6.0)       | 1386 (6.6)       | 174 (5.2)      | 1290 (6.8)      |
| Untested/indeterminate                                                                     | 1650<br>(21.0) | 90<br>(22.7)  | 1560<br>(20.9) | 309 (26.4)     | 1341<br>(20.0) | 4424<br>(19.7)   | 295<br>(22.6)  | 4129<br>(19.5)   | 838 (25.0)     | 3586<br>(18.8)  |
| Vaccination status                                                                         |                |               |                |                |                |                  |                |                  |                |                 |
| Fully vaccinated (two or more doses)                                                       | 312 (4.0)      | 27 (6.8)      | 285 (3.8)      | 91 (7.8)       | 221 (3.3)      | 312 (1.4)        | 34 (2.6)       | 278 (1.3)        | 96 (2.9)       | 216 (1.1)       |
| Partially vaccinated (one dose)                                                            | 407 (5.2)      | 19 (4.8)      | 388 (5.2)      | 72 (6.2)       | 335 (5.0)      | 754 (3.4)        | 98 (7.5)       | 649 (3.1)        | 281 (8.4)      | 466 (2.4)       |
| Unvaccinated                                                                               | 7156<br>(90.9) | 351<br>(88.4) | 6805<br>(91.0) | 1006<br>(86.1) | 6150<br>(91.7) | 21,395<br>(95.3) | 1175<br>(89.9) | 20,227<br>(95.6) | 2979<br>(88.8) | 18423<br>(96.4) |
| <b>Comorbidities from index hospitalization episode and hospitalizations in prior year</b> |                |               |                |                |                |                  |                |                  |                |                 |
| Mean Charlson comorbidity score (SD)                                                       | 1.0 (1.6)      | 1.6 (2.0)     | 1.0 (1.6)      | 1.9 (2.3)      | 0.8 (1.4)      | 0.4 (1.3)        | 0.9 (2.0)      | 0.4 (1.2)        | 1.2 (2.2)      | 0.2 (1.0)       |
| Chronic pulmonary disease (COPD/asthma)                                                    | 593 (7.5)      | 41<br>(10.3)  | 552 (7.4)      | 142 (12.1)     | 451 (6.7)      | 1693 (7.5)       | 135<br>(10.3)  | 1558 (7.4)       | 393 (11.7)     | 1300 (6.8)      |
| Heart failure or cardiomyopathy                                                            | 291 (3.7)      | 31 (7.8)      | 260 (3.5)      | 107 (9.2)      | 184 (2.7)      | 1296 (5.8)       | 160<br>(12.2)  | 1136 (5.4)       | 528 (15.7)     | 768 (4.0)       |
| Hypertension                                                                               | 933<br>(11.8)  | 63<br>(15.9)  | 870<br>(11.6)  | 197 (16.9)     | 736<br>(11.0)  | 6220<br>(27.7)   | 437<br>(33.4)  | 5783<br>(27.3)   | 1243<br>(37.0) | 4977<br>(26.1)  |
| Diabetes mellitus                                                                          | 2325<br>(29.5) | 137<br>(34.5) | 2188<br>(29.3) | 416 (35.6)     | 1909<br>(28.5) | 7103<br>(31.6)   | 511<br>(39.1)  | 6592<br>(31.2)   | 1341<br>(40.0) | 5762<br>(30.2)  |
| Coronary artery disease, including prior myocardial infarction, CABG surgery, PCI/stenting | 251 (3.2)      | 18 (4.5)      | 233 (3.1)      | 63 (5.4)       | 188 (2.8)      | 1301 (5.8)       | 149<br>(11.4)  | 1152 (5.4)       | 386 (11.5)     | 915 (4.8)       |
| Peripheral arterial disease                                                                | 46 (0.6)       | 7 (1.8)       | 39 (0.5)       | 19 (1.6)       | 27 (0.4)       | 235 (1.0)        | 30 (2.3)       | 205 (1.0)        | 88 (2.6)       | 147 (0.8)       |
| Cerebrovascular disease (including previous stroke/transient ischemic attack)              | 96 (1.2)       | 3 (0.8)       | 93 (1.2)       | 23 (2.0)       | 73 (1.1)       | 477 (2.1)        | 38 (2.9)       | 439 (2.1)        | 139 (4.1)      | 338 (1.8)       |
| Atrial fibrillation/flutter                                                                | 314 (4.0)      | 21 (5.3)      | 293 (3.9)      | 87 (7.4)       | 227 (3.4)      | 1425 (6.3)       | 139<br>(10.6)  | 1286 (6.1)       | 441 (13.1)     | 984 (5.2)       |

|                                      |           |           |           |            |           |            |            |           |            |           |
|--------------------------------------|-----------|-----------|-----------|------------|-----------|------------|------------|-----------|------------|-----------|
| Ventricular arrhythmias              | 14 (0.2)  | 0 (0.0)   | 14 (0.2)  | 4 (0.3)    | 10 (0.1)  | 61 (0.3)   | 8 (0.6)    | 53 (0.3)  | 20 (0.6)   | 41 (0.2)  |
| Renal disease                        | 228 (2.9) | 25 (6.3)  | 203 (2.7) | 77 (6.6)   | 151 (2.3) | 939 (4.2)  | 116 (8.9)  | 823 (3.9) | 330 (9.8)  | 609 (3.2) |
| Cancer                               | 214 (2.7) | 21 (5.3)  | 193 (2.6) | 94 (8.0)   | 120 (1.8) | 1076 (4.8) | 141 (10.8) | 935 (4.4) | 423 (12.6) | 653 (3.4) |
| Other lung disease (non-COPD/asthma) | 140 (1.8) | 16 (4.0)  | 124 (1.7) | 61 (5.2)   | 79 (1.2)  | 375 (1.7)  | 42 (3.2)   | 333 (1.6) | 125 (3.7)  | 250 (1.3) |
| Peptic ulcer disease                 | 47 (0.6)  | 2 (0.5)   | 45 (0.6)  | 15 (1.3)   | 32 (0.5)  | 143 (0.6)  | 14 (1.1)   | 129 (0.6) | 55 (1.6)   | 88 (0.5)  |
| Liver disease                        | 171 (2.2) | 15 (3.8)  | 156 (2.1) | 63 (5.4)   | 108 (1.6) | 431 (1.9)  | 37 (2.8)   | 394 (1.9) | 123 (3.7)  | 308 (1.6) |
| Dementia                             | 168 (2.1) | 24 (6.0)  | 144 (1.9) | 61 (5.2)   | 107 (1.6) | 1065 (4.7) | 158 (12.1) | 907 (4.3) | 415 (12.4) | 650 (3.4) |
| Mean LACE score (SD)                 | 9.2 (2.9) | 9.5 (3.5) | 9.2 (2.8) | 10.6 (3.5) | 8.9 (2.7) | 8.6 (2.7)  | 9.2 (3.3)  | 8.5 (2.7) | 9.9 (3.2)  | 8.3 (2.5) |

Abbreviations: CABG, coronary artery bypass graft; COPD, chronic obstructive pulmonary disease; ED, emergency department; ICU, intensive care unit; PCI, percutaneous coronary intervention; SD, standard deviation.

\* Results for Alberta are based on the Pampalon index and Ontario's on the Ontario Marginalization index.
